# Supplementary material for: NIR-excited superoxide radical procreators to eradicate tumors by targeting the lyso-membrane
Source: Royal Society of Chemistry journal article supplement (doi:10.1039/c9tb00721k), 2019-01-01
Supplement: c9tb00721k1.pdf [file c9tb00721k1.pdf]

## Supporting Information

### **NIR excited superoxide procreators to eradicate the tumor cells by Targeting Lyso-membrane**

Bhaskar Gurram,<sup>a</sup> Miao Li,<sup>a</sup> Mingle Li,<sup>a</sup> Kalayou H Gebremedhin,<sup>a</sup> Wen Sun,<sup>a</sup> Jiangli Fan,<sup>a</sup>  
Jingyun Wang,<sup>b</sup> and Xiaojun Peng<sup>a\*</sup>

<sup>a</sup>State Key Laboratory of Fine Chemicals and <sup>b</sup>School of Life Science and Biotechnology,  
Dalian University of Technology, 2 Linggong Road, Hi-tech Zone, Dalian 116024, P.R. China.

Corresponding Author Email: \* [pengxj@dlut.edu.cn](mailto:pengxj@dlut.edu.cn) Tel/Fax: +86-411-84986306

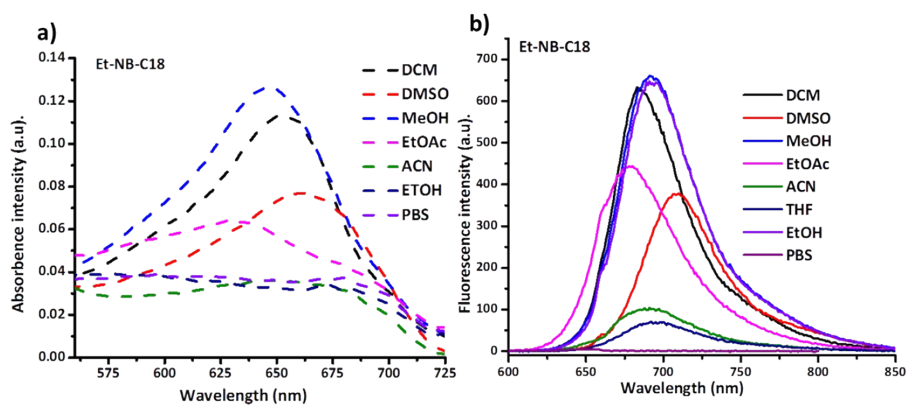

Figure S1. The absorbance (a) and emission (b) spectra of Et-NB-C18 (4  $\mu$ M) in different solvents.

| Solvent | $\lambda_{\text{abs}}(\text{nm})$ <sup>[a]</sup> | $\lambda_{\text{em}}(\text{nm})$ <sup>[b]</sup> | $\Delta\lambda(\text{nm})$ | $\epsilon(\times 10^5 \text{L}/(\text{M}^{-1} \cdot \text{cm}))$ <sup>[c]</sup> | $\Phi$ <sup>[d]</sup> |
|---------|--------------------------------------------------|-------------------------------------------------|----------------------------|---------------------------------------------------------------------------------|-----------------------|
| DCM     | 662                                              | 700                                             | 38                         | 0.447                                                                           | 0.442                 |
| DMSO    | 662                                              | 720                                             | 58                         | 0.337                                                                           | 0.203                 |
| MeOH    | 654                                              | 702                                             | 48                         | 0.586                                                                           | 0.168                 |
| EtOAc   | 640                                              | 675                                             | 35                         | 0.261                                                                           | 0.363                 |
| THF     | 662                                              | 710                                             | 48                         | 0.174                                                                           | 0.148                 |
| ACN     | 662                                              | 700                                             | 38                         | 0.176                                                                           | 0.189                 |
| EtOH    | 660                                              | 695                                             | 35                         | 0.488                                                                           | 0.167                 |
| PBS     | 671                                              | 700                                             | 29                         | 0.089                                                                           | 0.026                 |

[a, b] The absorption and emission wavelength; [c] Fluorescence quantum yield; [d] Molar extinction coefficient.

Table S1. Photophysical properties of Et-NB-C18 in various solvents

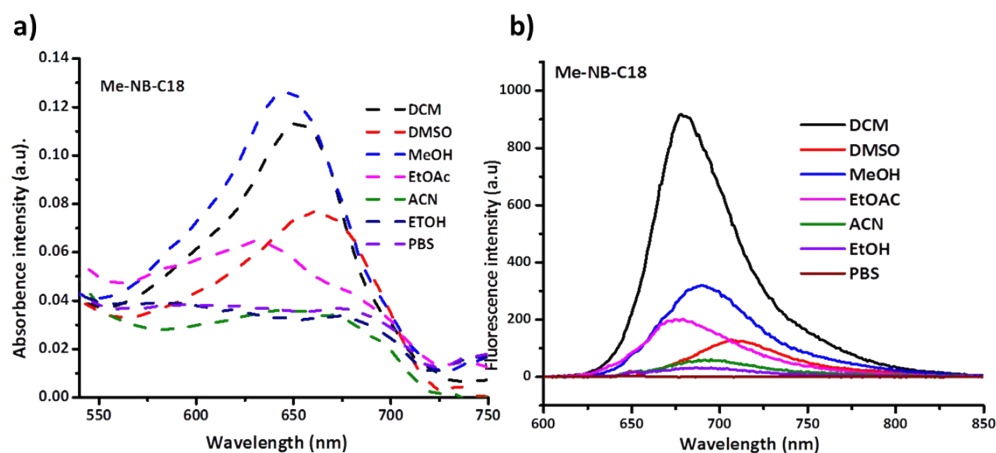

Figure S2. The absorbance (a) and emission (b) spectra of Me-NB-C18 (4  $\mu$ M) in different solvents

| Solvent | $\lambda_{\text{abs}}(\text{nm})^{[a]}$ | $\lambda_{\text{em}}(\text{nm})^{[b]}$ | $\Delta\lambda(\text{nm})$ | $\epsilon(\times 10^5 \text{L}/(\text{M}^{-1} \cdot \text{cm}))^{[c]}$ | $\Phi^{[d]}$ |
|---------|-----------------------------------------|----------------------------------------|----------------------------|------------------------------------------------------------------------|--------------|
| DCM     | 651                                     | 694                                    | 43                         | 0.282                                                                  | 0.453        |
| DMSO    | 662                                     | 710                                    | 48                         | 0.323                                                                  | 0.160        |
| MeOH    | 649                                     | 690                                    | 41                         | 0.312                                                                  | 0.151        |
| EtOAc   | 637                                     | 675                                    | 38                         | 0.157                                                                  | 0.274        |
| ACN     | 645                                     | 690                                    | 45                         | 0.091                                                                  | 0.197        |
| EtOH    | 637                                     | 696                                    | 59                         | 0.084                                                                  | 0.167        |
| PBS     | 636                                     | 700                                    | 64                         | 0.176                                                                  | 0.015        |

[a, b] The absorption and emission wavelength; [c] Fluorescence quantum yield; [d] Molar extinction coefficient.

**Table S2.** Photophysical properties of Me-NB-C18 in various solvents

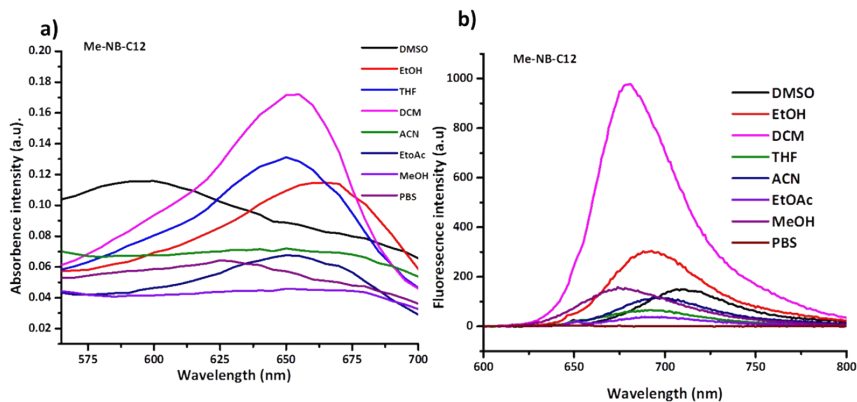

**Figure S3.** The absorbance (a) and emission (b) spectra of Me-NB-C12 (4  $\mu\text{M}$ ) in different solvents

| Solvent | $\lambda_{\text{abs}}(\text{nm})^{[a]}$ | $\lambda_{\text{em}}(\text{nm})^{[b]}$ | $\Delta\lambda(\text{nm})$ | $\epsilon(\times 10^5 \text{L}/(\text{M}^{-1} \cdot \text{cm}))^{[c]}$ | $\Phi^{[d]}$ |
|---------|-----------------------------------------|----------------------------------------|----------------------------|------------------------------------------------------------------------|--------------|
| DMO     | 651                                     | 710                                    | 59                         | 0.287                                                                  | 0.145        |
| EtOH    | 664                                     | 695                                    | 31                         | 0.285                                                                  | 0.329        |
| DCM     | 650                                     | 694                                    | 44                         | 0.327                                                                  | 0.477        |
| EA      | 650                                     | 700                                    | 50                         | 0.114                                                                  | 0.329        |
| THF     | 654                                     | 687                                    | 33                         | 0.180                                                                  | 0.095        |
| ACN     | 650                                     | 700                                    | 50                         | 0.098                                                                  | 0.211        |
| PBS     | 651                                     | 690                                    | 39                         | 0.096                                                                  | 0.017        |

[a, b] The absorption and emission wavelength; [c] Fluorescence quantum yield; [d] Molar extinction coefficient.

**Table S3.** Photophysical properties of Et-NB-C12 in various solvents

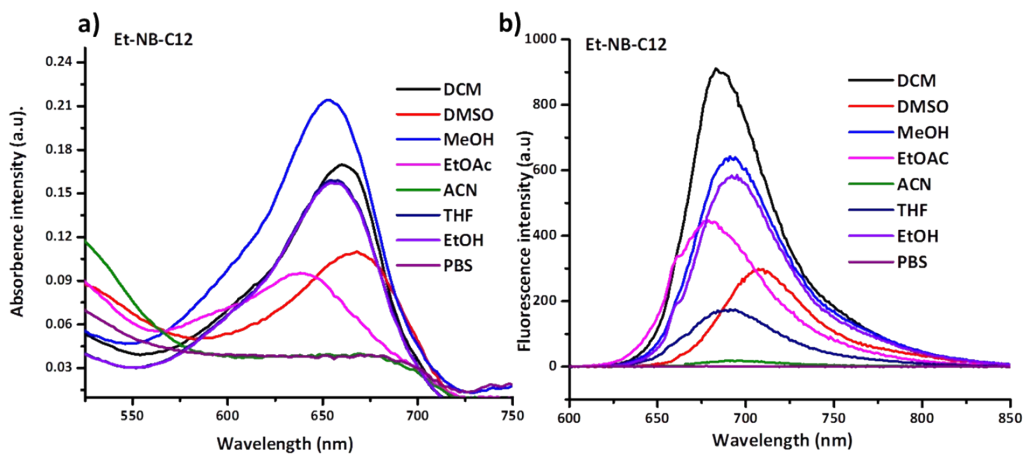

**Figure S4.** The absorbance (a) and emission (b) spectra of Et-NB-C12 (4  $\mu$ M) in different solvents

| Solvent | $\lambda_{\text{abs}}(\text{nm})^{[a]}$ | $\lambda_{\text{em}}(\text{nm})^{[b]}$ | $\Delta\lambda(\text{nm})$ | $\epsilon(\times 10^5 \text{L}/(\text{M}^{-1} \cdot \text{cm}))^{[c]}$ | $\Phi^{[d]}$ |
|---------|-----------------------------------------|----------------------------------------|----------------------------|------------------------------------------------------------------------|--------------|
| DMO     | 662                                     | 715                                    | 50                         | 0.272                                                                  | 0.202        |
| EtOH    | 657                                     | 700                                    | 43                         | 0.392                                                                  | 0.169        |
| DCM     | 662                                     | 696                                    | 34                         | 0.422                                                                  | 0.437        |
| EA      | 655                                     | 700                                    | 45                         | 0.198                                                                  | 0.364        |
| THF     | 654                                     | 690                                    | 36                         | 0.397                                                                  | 0.184        |
| ACN     | 662                                     | 700                                    | 38                         | 0.097                                                                  | 0.203        |
| PBS     | 661                                     | 696                                    | 35                         | 0.089                                                                  | 0.021        |

[a, b] The absorption and emission wavelength; [c] Fluorescence quantum yield; [d] Molar extinction coefficient.

**Table S4.** Photophysical properties of Et-NB-C12 in various solvents

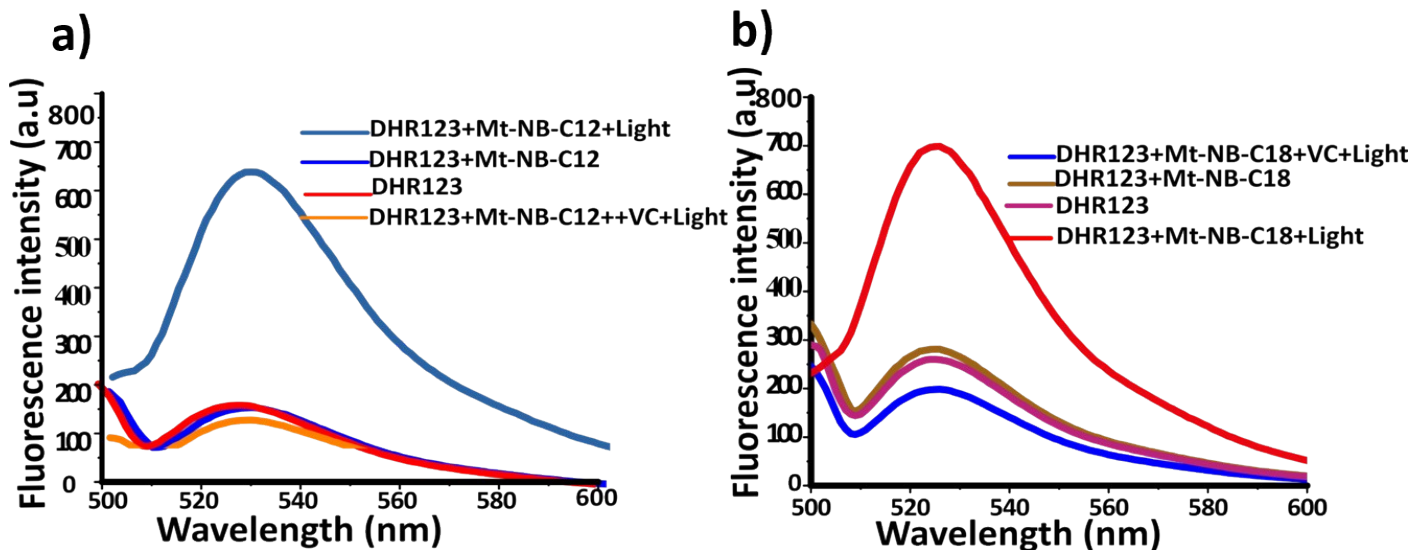

**Figure S5.** Fluorescence spectra for confirmation of  $\text{O}_2^{\cdot -}$  using DHR123 with NIR photosensitizers. a-b) Fluorescence spectra for confirmation of  $\text{O}_2^{\cdot -}$  using DHR123 fluorescence emission spectra at 525 nm after 660 nm irradiation for 8 min with **Et-NB-C12** and **Et-NB-C18**.

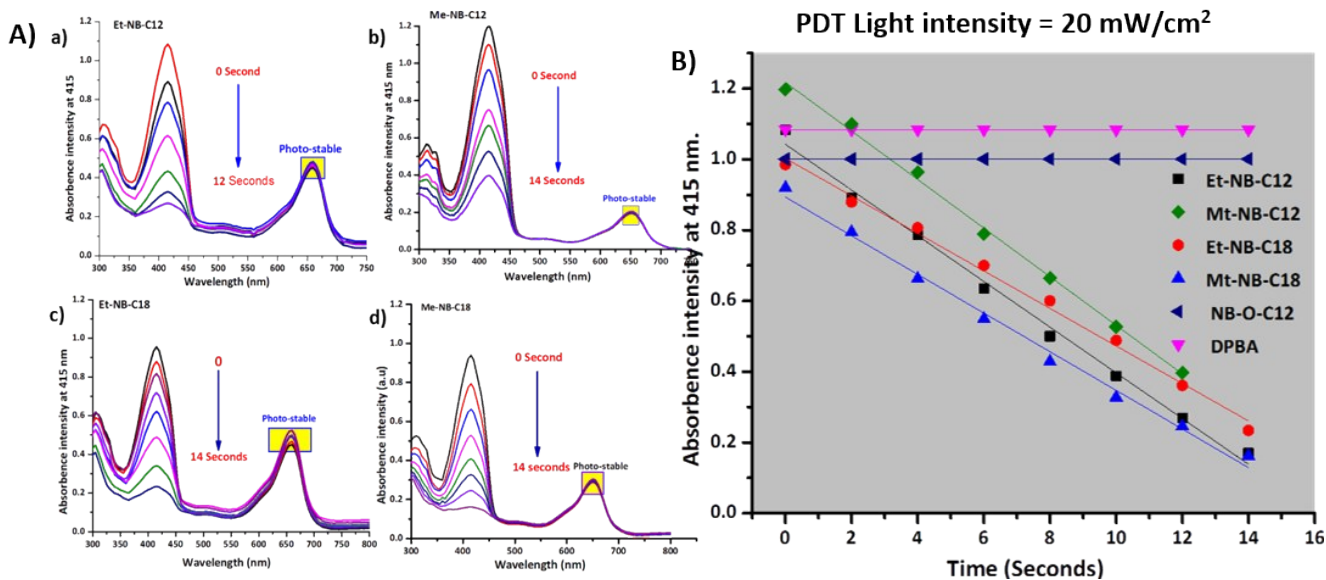

**Figure S6.** DPBF Photo- degradation decay rate at 415 with NIR photosensitizers. A: a-d) Assessment of DPBF Photo- degradation decay rate at 415 with NIR photosensitizers under illumination of  $\lambda_{ex}$  660 nm of irradiation; B) DPBF absorbance decay rates at 415 nm as a function of irradiation time under light illumination at 660 nm (20 mW/cm<sup>2</sup>) in the presence of NIR photosensitizers.

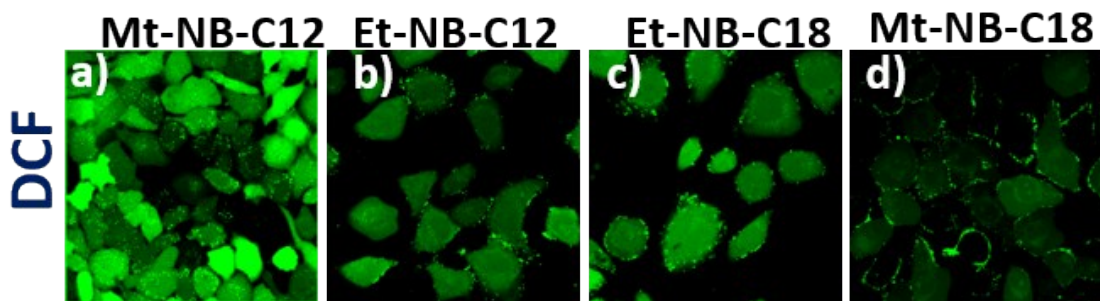

**Figure S7.** DCF assay. a-d) Cells were stained with DCF before irradiation at 660 nm of light (24 mW/cm<sup>2</sup>) with NIR photosensitizers. Scanning range of DCF at  $\lambda_{ex}$  488 -  $\lambda_{em}$  500-550 nm.

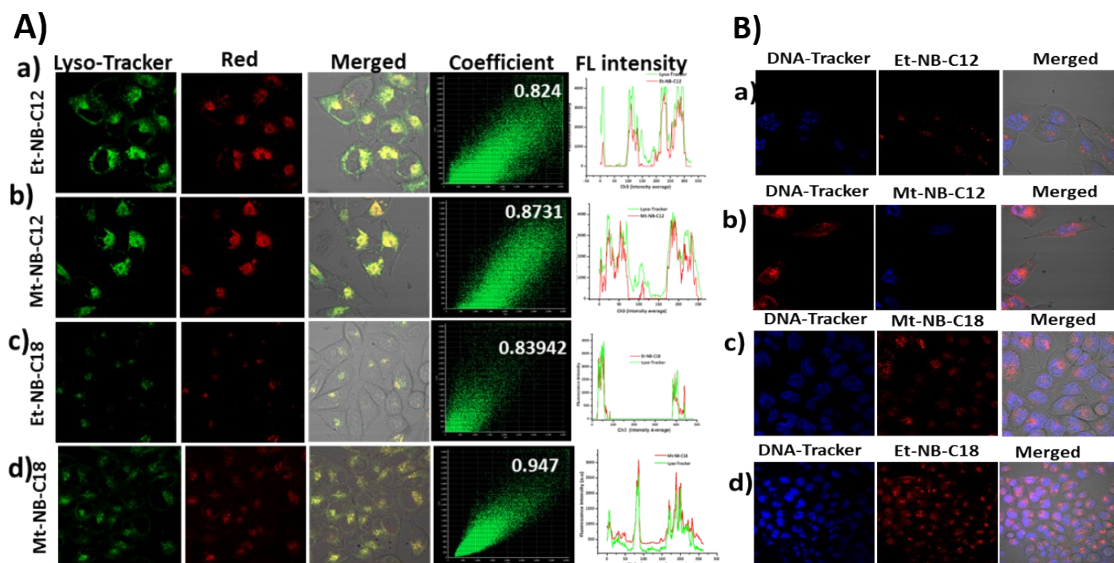

**Figure S8.** Co-localization of NIR photosensitizers with lyso- tracker green and Hoechst 33342 blue. A: a-d) Co-localization of lyso- tracker green ( $\lambda_{\text{ex}}$  488 -  $\lambda_{\text{em}}$  510-540 nm) with NIR cationic photosensitizers ( $\lambda_{\text{ex}}$  635 -  $\lambda_{\text{em}}$  670-720 nm); B: a-d) Co localization of Hoechst 33342 blue ( $\lambda_{\text{ex}}$  488 -  $\lambda_{\text{em}}$  515-540 nm) with NIR photosensitizers ( $\lambda_{\text{ex}}$  660 -  $\lambda_{\text{em}}$  670-720 nm).

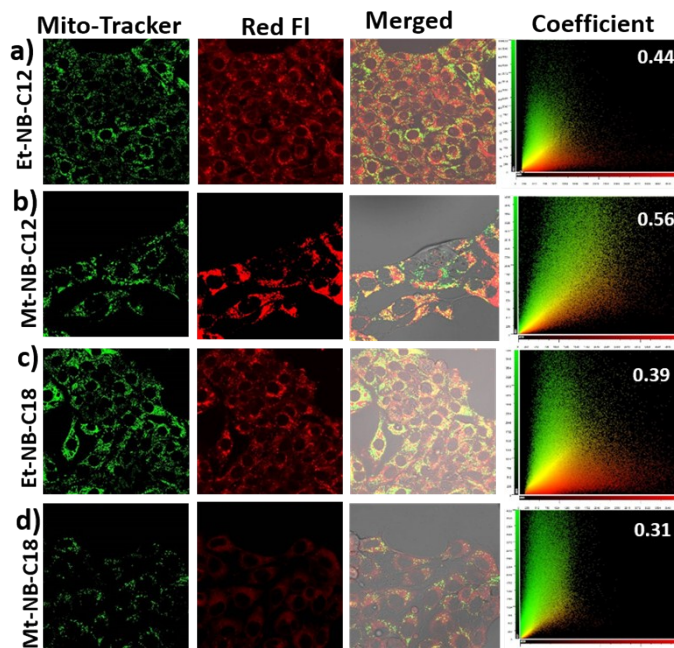

**Figure S 9.** Co-localization of NIR photosensitizers with mito- tracker green. a-d) Co-localization of mito- tracker green ( $\lambda_{\text{ex}}$  488 -  $\lambda_{\text{em}}$  500-540 nm) with NIR cationic photosensitizers ( $\lambda_{\text{ex}}$  635 -  $\lambda_{\text{em}}$  670-720 nm);

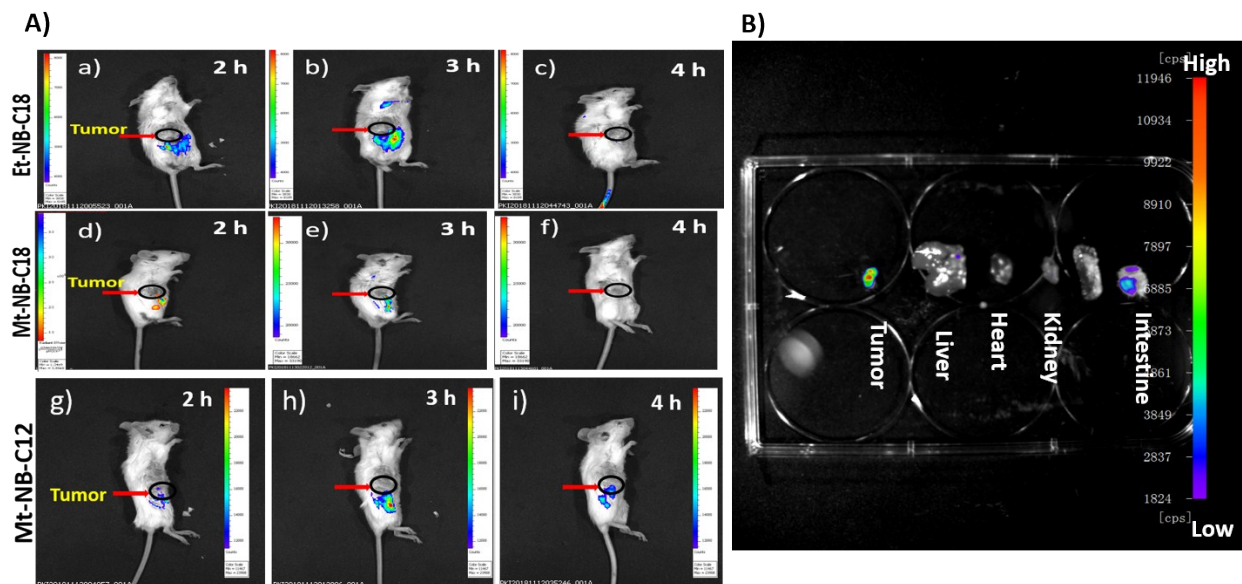

**Figure S10.** *In vivo* imaging of tumor tissue and vital mice organs. *In vivo* imaging of tumor tissue (A) and (B) vital mice organs (liver, heart, kidney, spleen and intestine) at 4 h of intratumoral injection of NIR photosensitizers ( $\lambda_{ex}$  660 -  $\lambda_{em}$  670-720 nm).

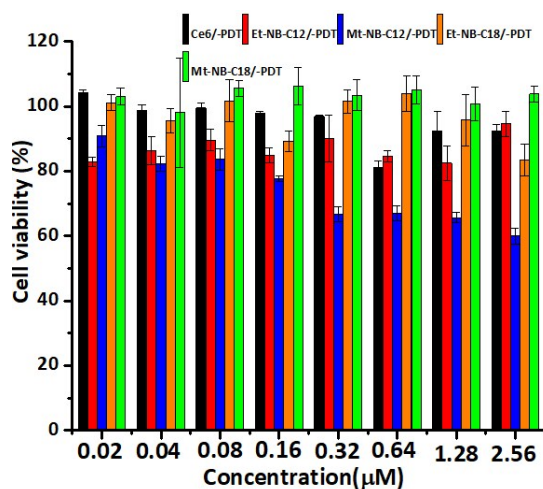

**Figure S11.** Dark toxicity of NIR photosensitizers (after 12 h of incubation)

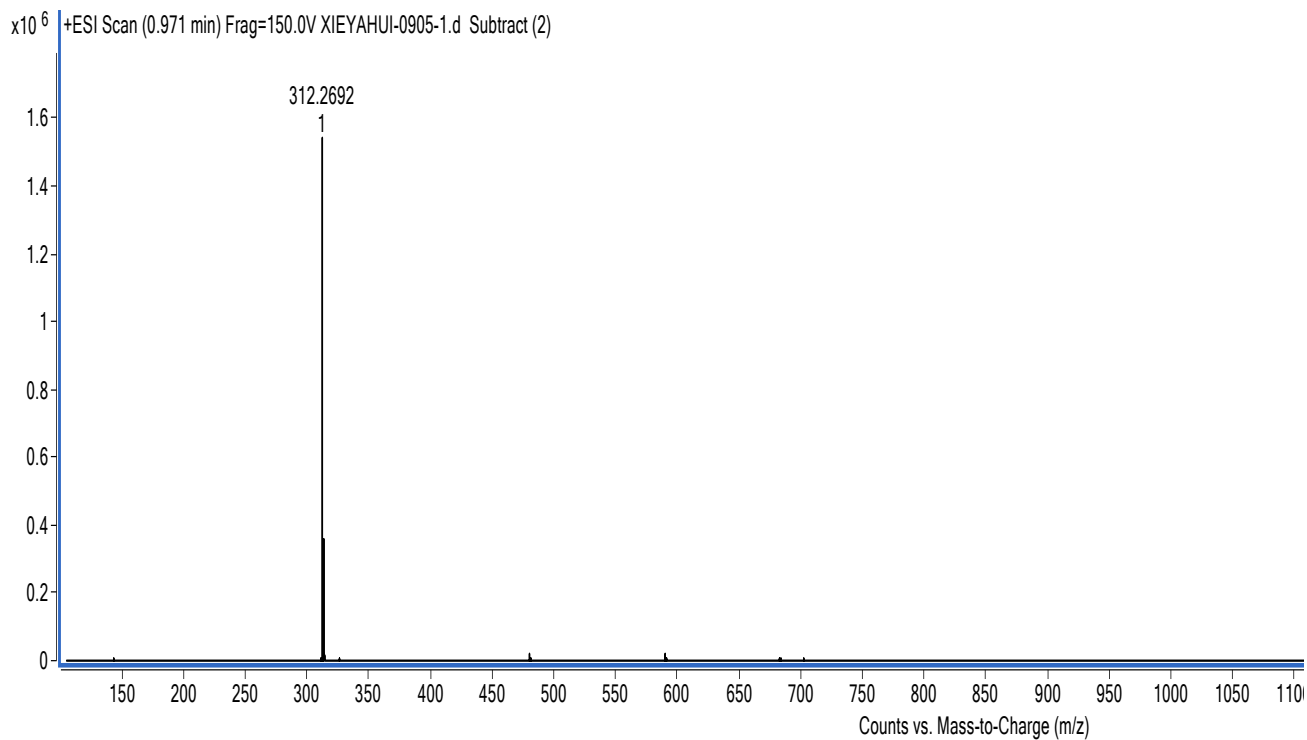

Figure S12. Mass of 1 R<sub>1</sub> = NB-C12

Apr04-2018  
G.Bhaskar  
pengxiaojun

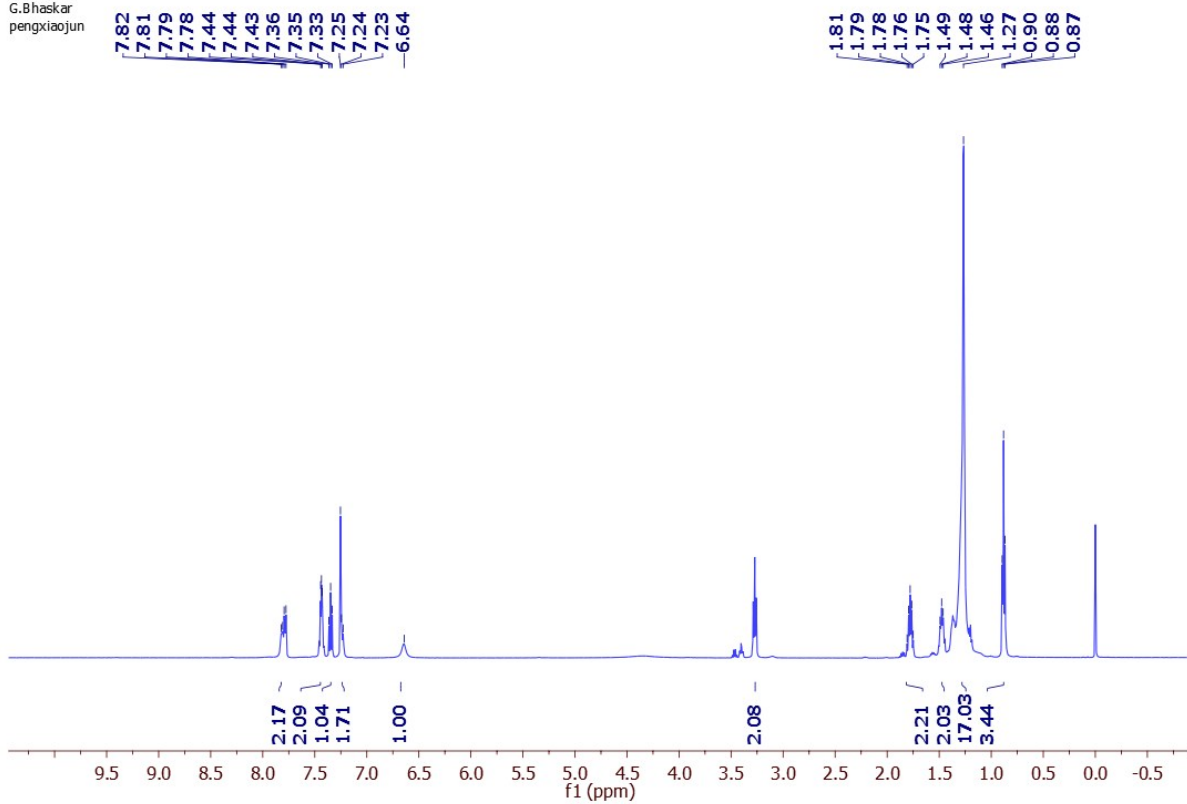

Figure S13. <sup>1</sup>H -NMR of 1 R<sub>1</sub> = NB-C12



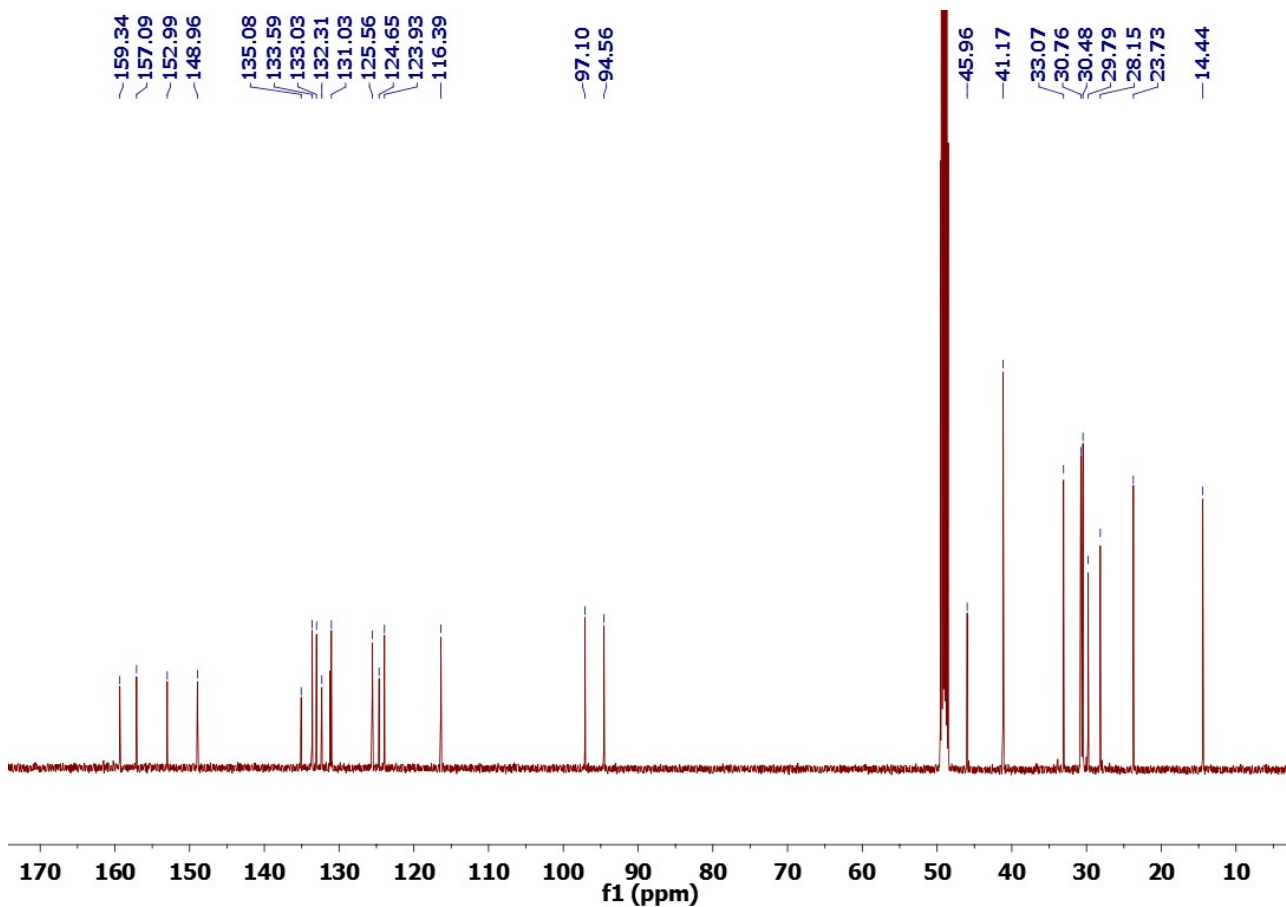

Figure S14.  $^{13}\text{C}$ -NMR of 1  $R_1 = \text{NB-C12}$

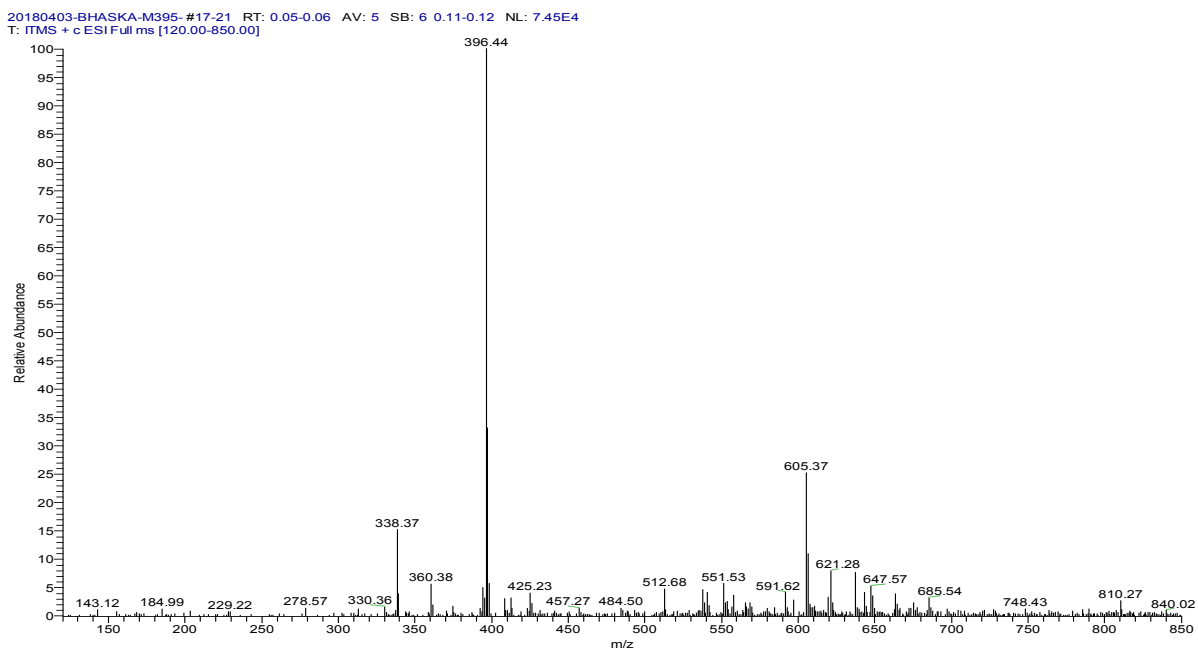

Figure S15. Mass of 2  $R_1 = \text{NB-C18}$

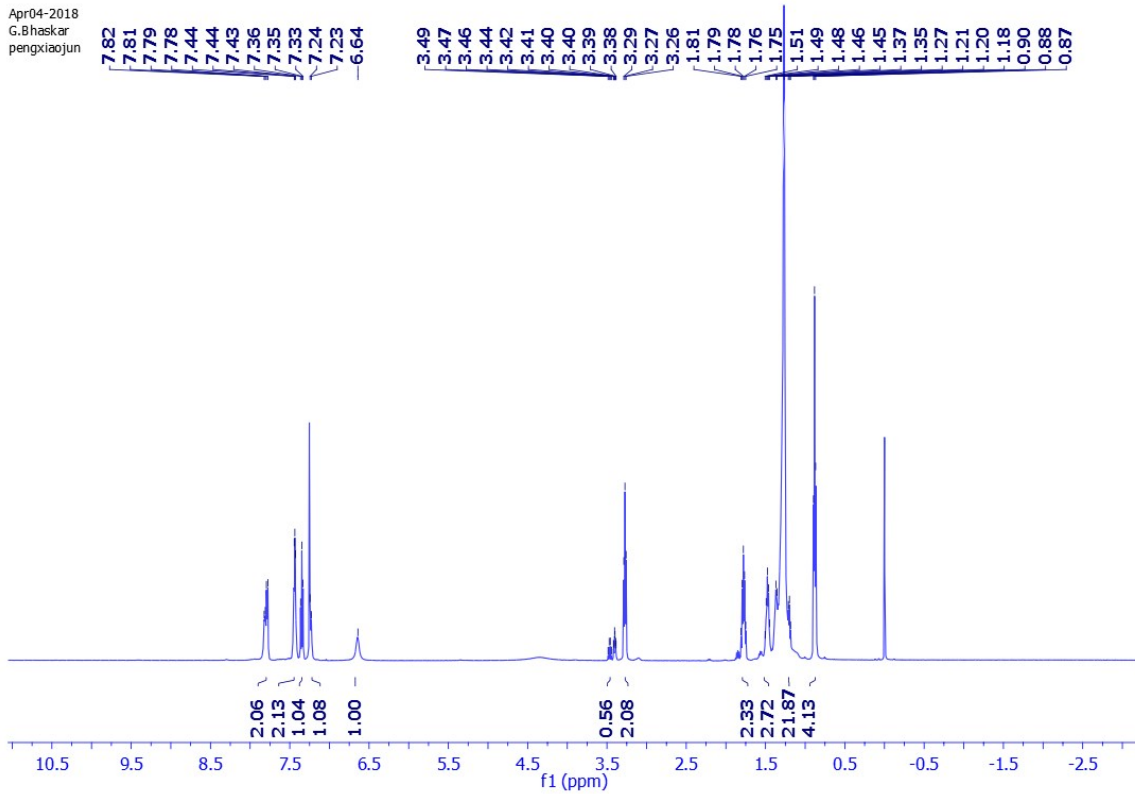

Figure S16.  $^1\text{H}$ -NMR of  $1 R_1 = \text{NB-C18}$

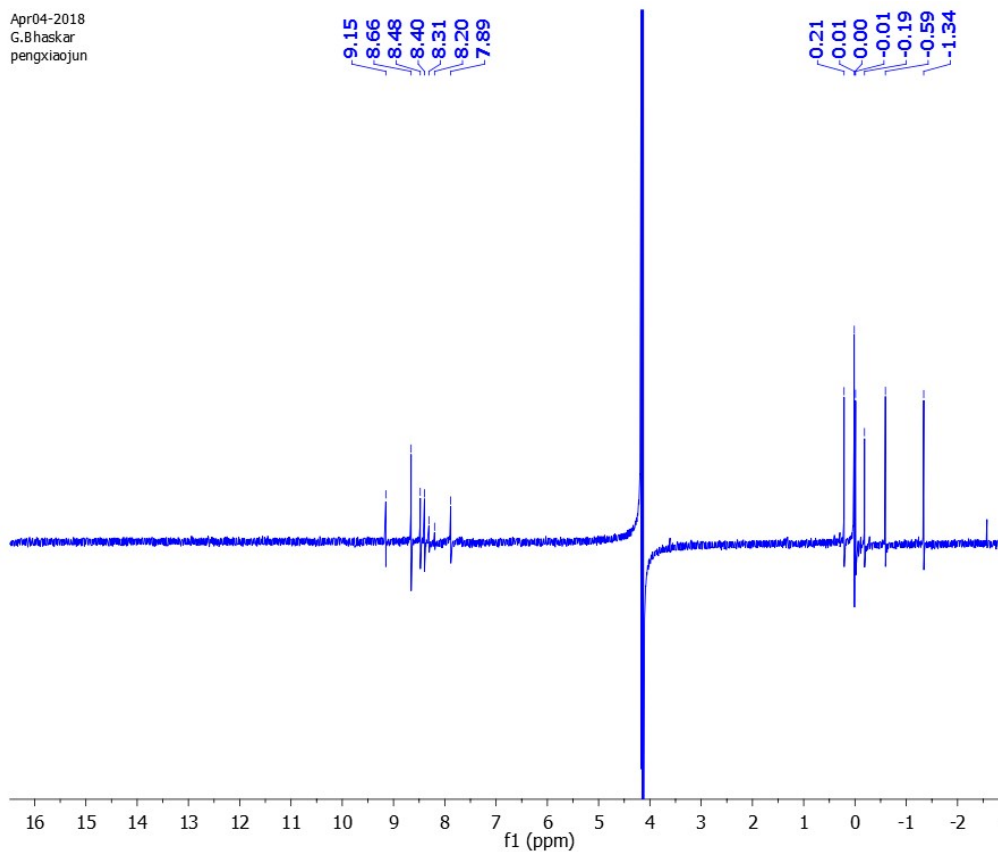

Figure S17.  $^{13}\text{C}$ -NMR of  $1 R_1 = \text{NB-C18}$

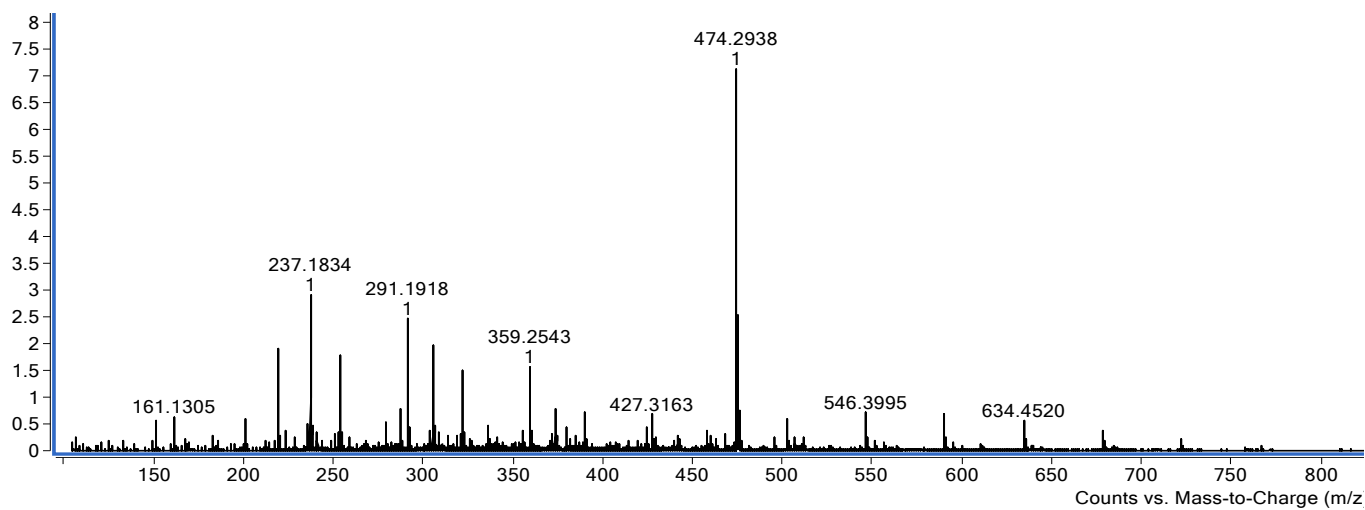

Figure S18. Mass of compound 2-R<sub>2</sub>(Mt-NB-C12)

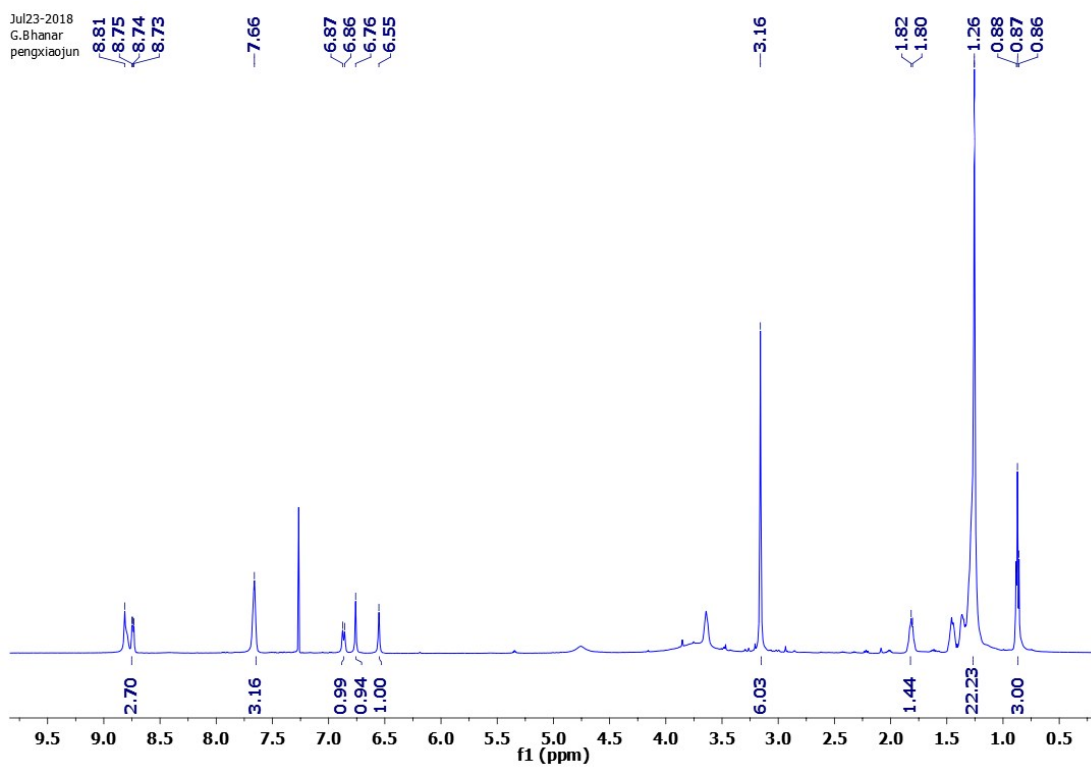

Figure S19. <sup>1</sup>H-NMR of compound 2-R<sub>2</sub>(Mt-NB-C12)

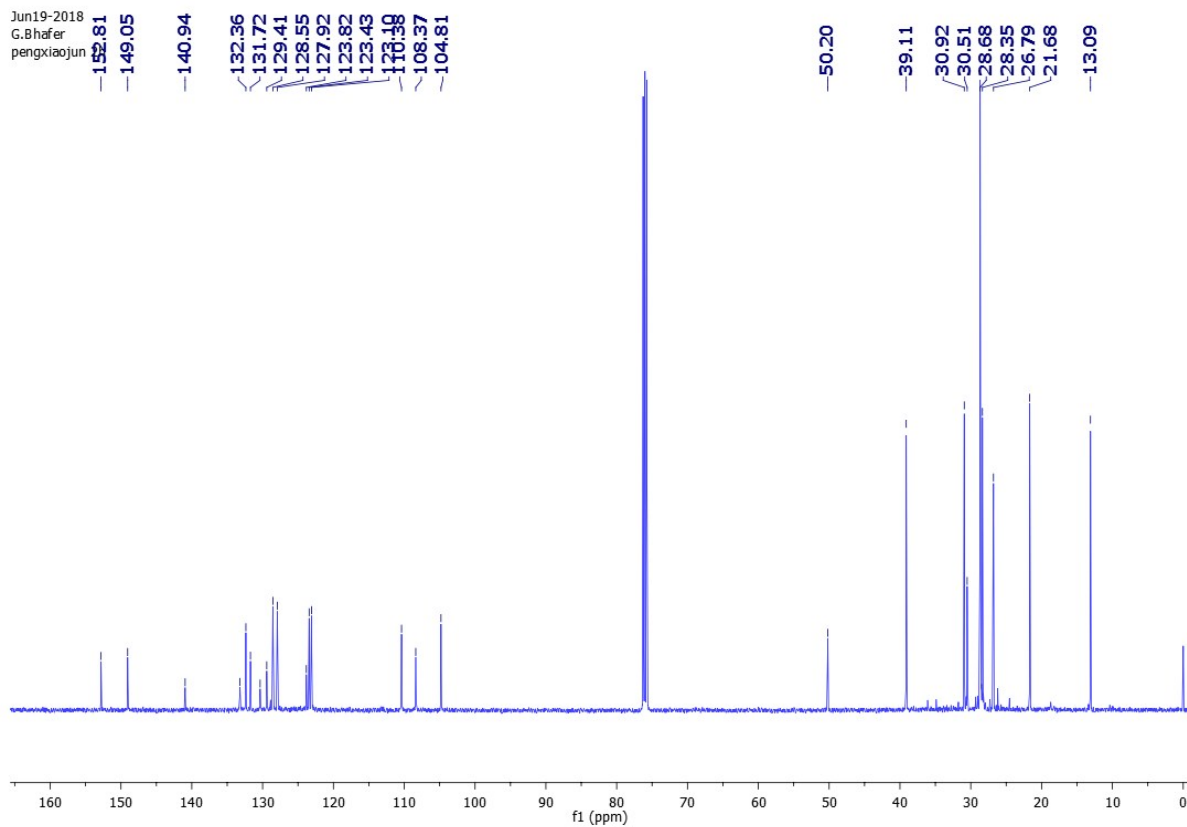

Figure S20.  $^{13}\text{C}$ -NMR of compound 2-R<sub>2</sub>(Mt-NB-C12)

20180710\_Bhaskar\_TSQ\_MS\_S2\_180710140713 #10-38 RT: 0.10-0.35 AV: 14 SB: 20 0.00-0.12, 0.57-0.82 NL: 1.61E7  
F: + c ESI Q1MS [100.000-1000.000]

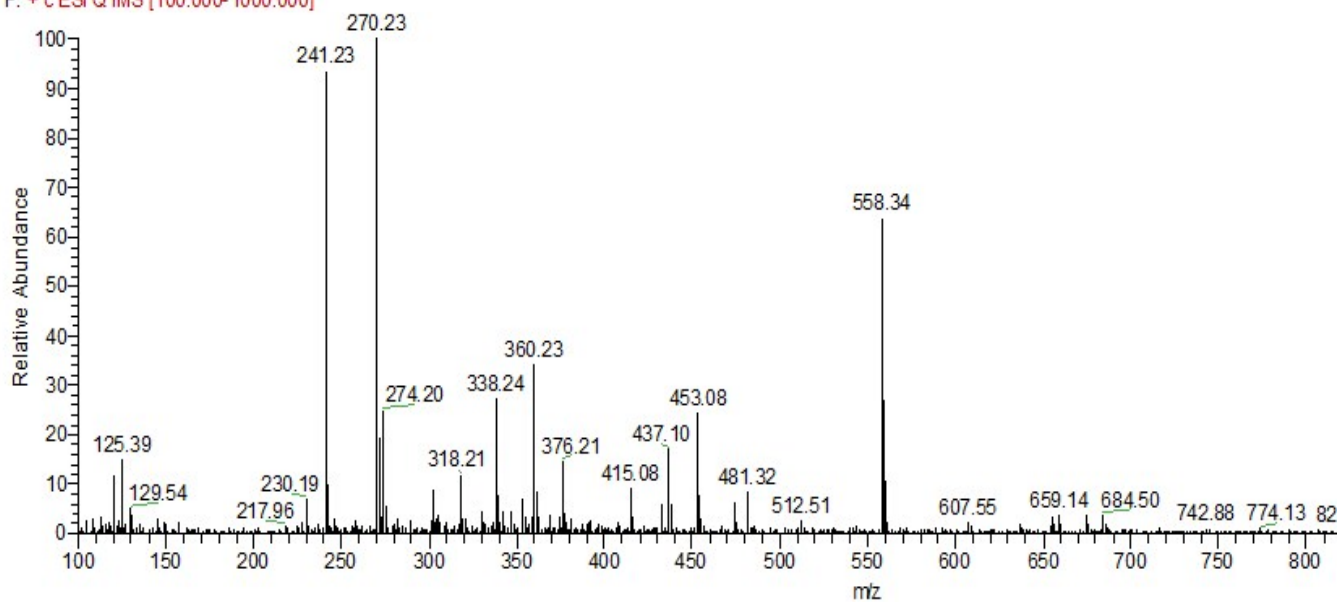

Figure S21. Mass of compound 3-R<sub>2</sub> (Mt-NB-C18)

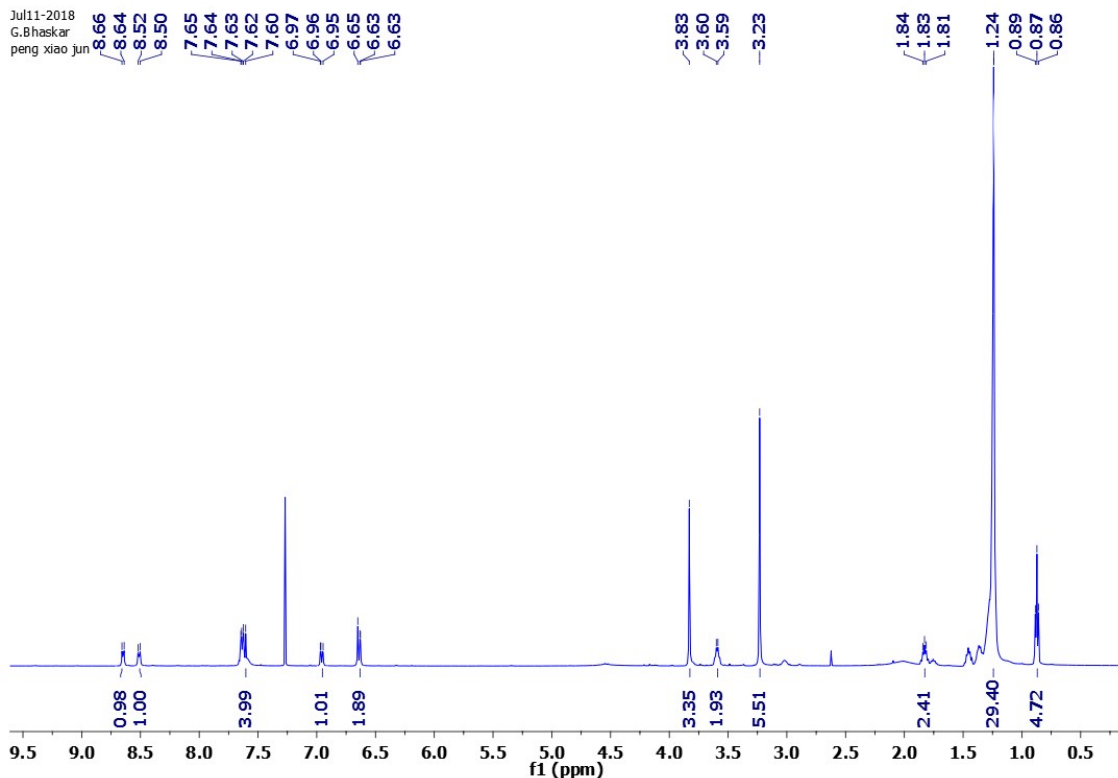

Figure S22.  $^1\text{H}$ -NMR of compound 3- $\text{R}_2$ (Mt-NB-C18).

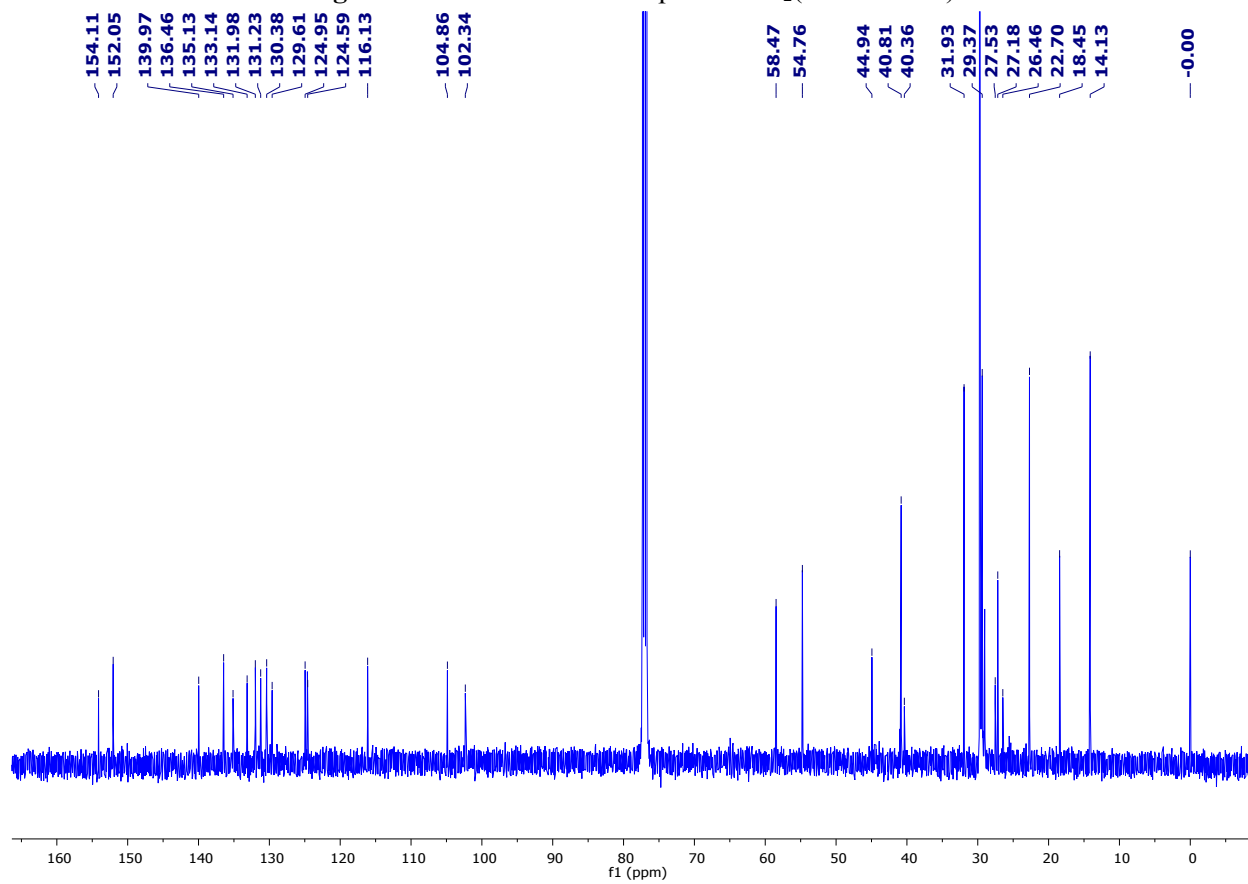

Figure S23.  $^{13}\text{C}$ -NMR of compound 3- $\text{R}_2$ (Mt-NB-C18)

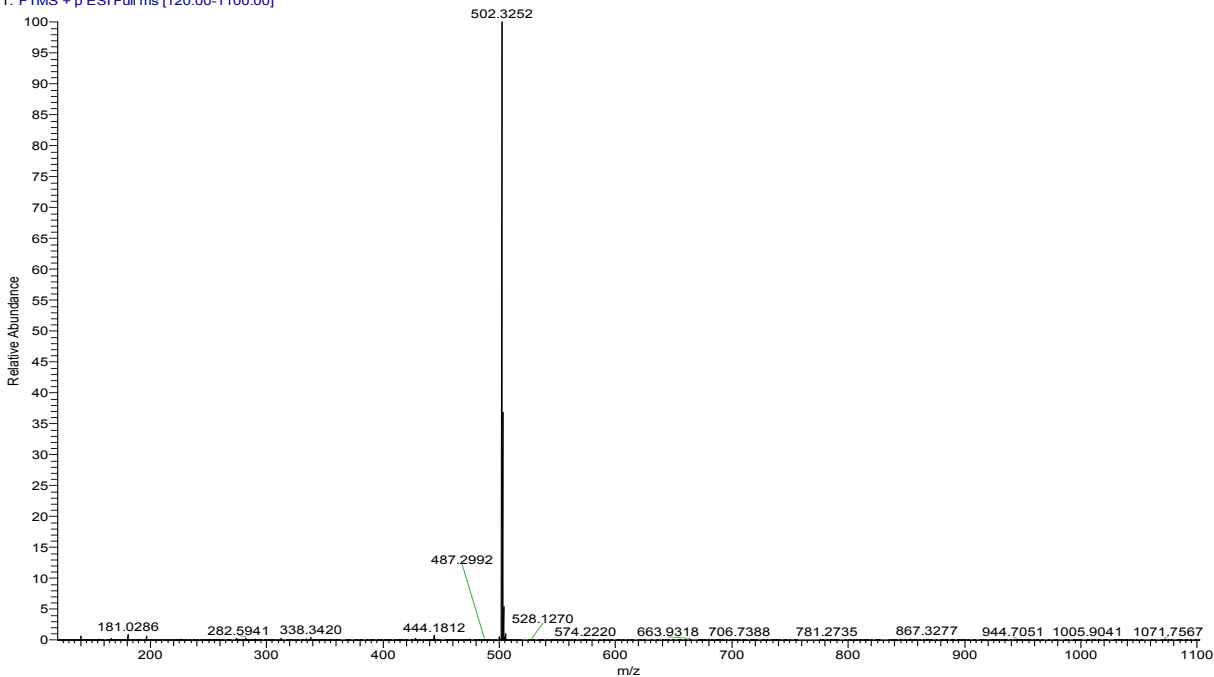

Figure S24. Mass of compound 4-R<sub>1</sub> (Et-NB-C12)

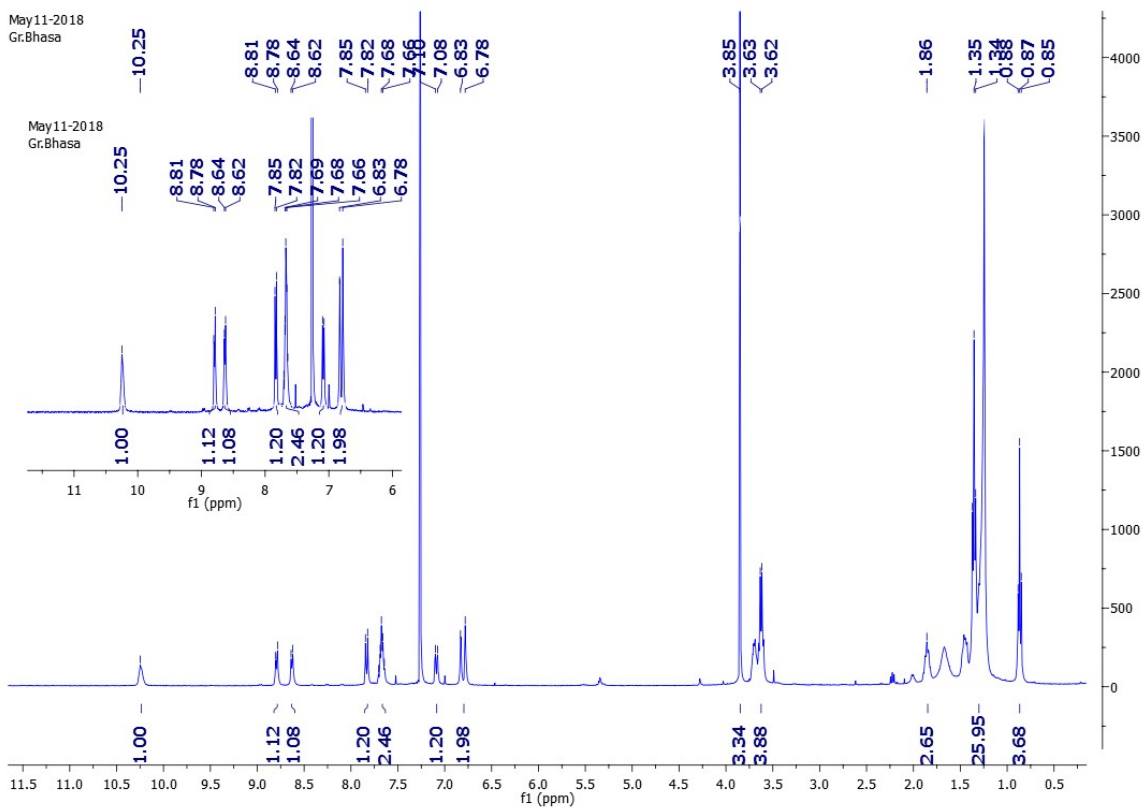

Figure S25. <sup>1</sup>H-NMR of compound 4-R<sub>1</sub>(Et-NB-C12)

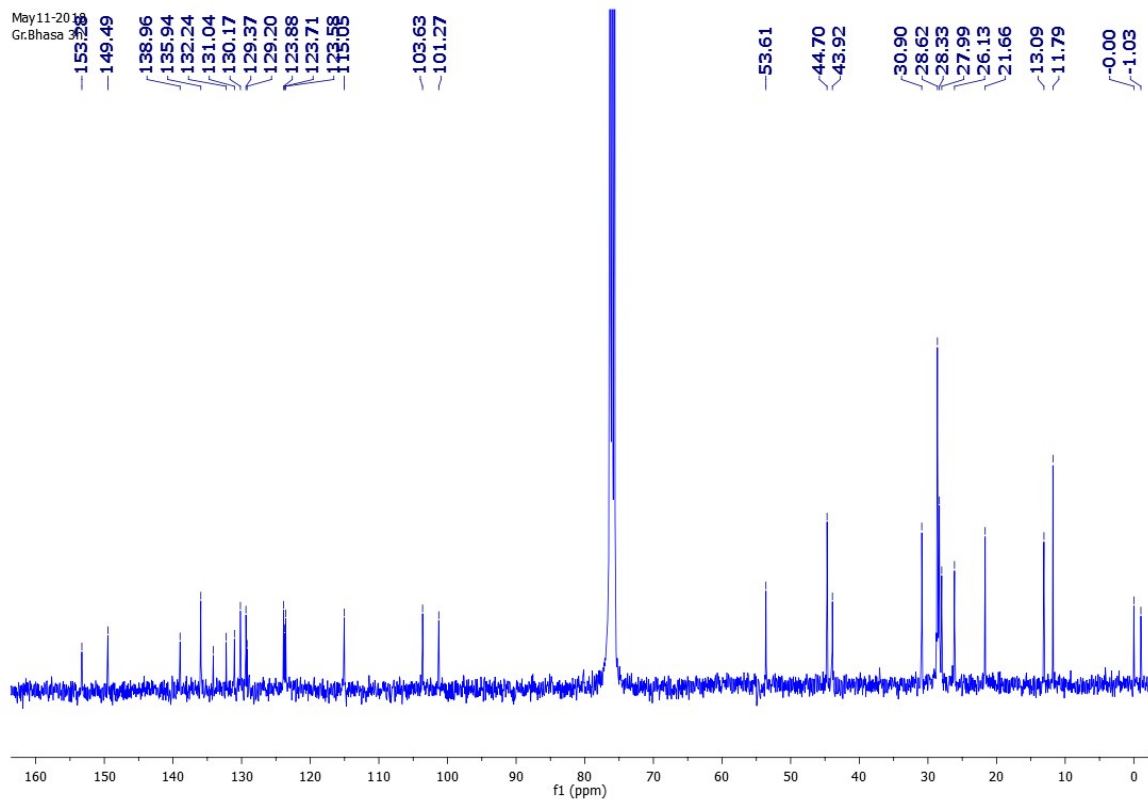

Figure S26.  $^{13}\text{C}$ -NMR of compound 4-R<sub>1</sub>(Et-NB-C12)

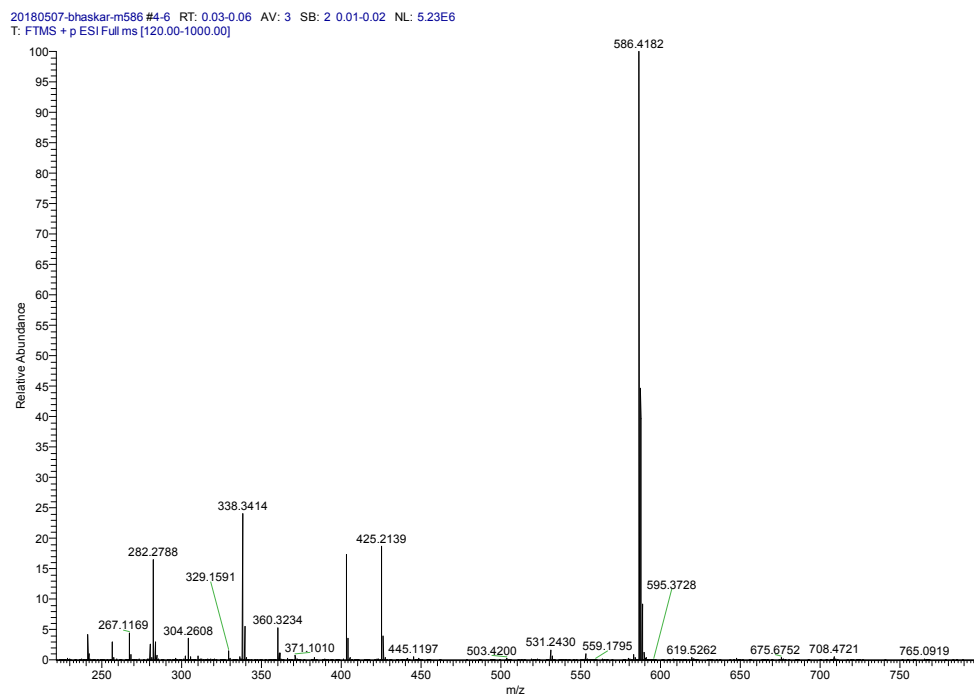

Figure S27. Mass of compound 5-R<sub>1</sub> (Et-NB-C18)

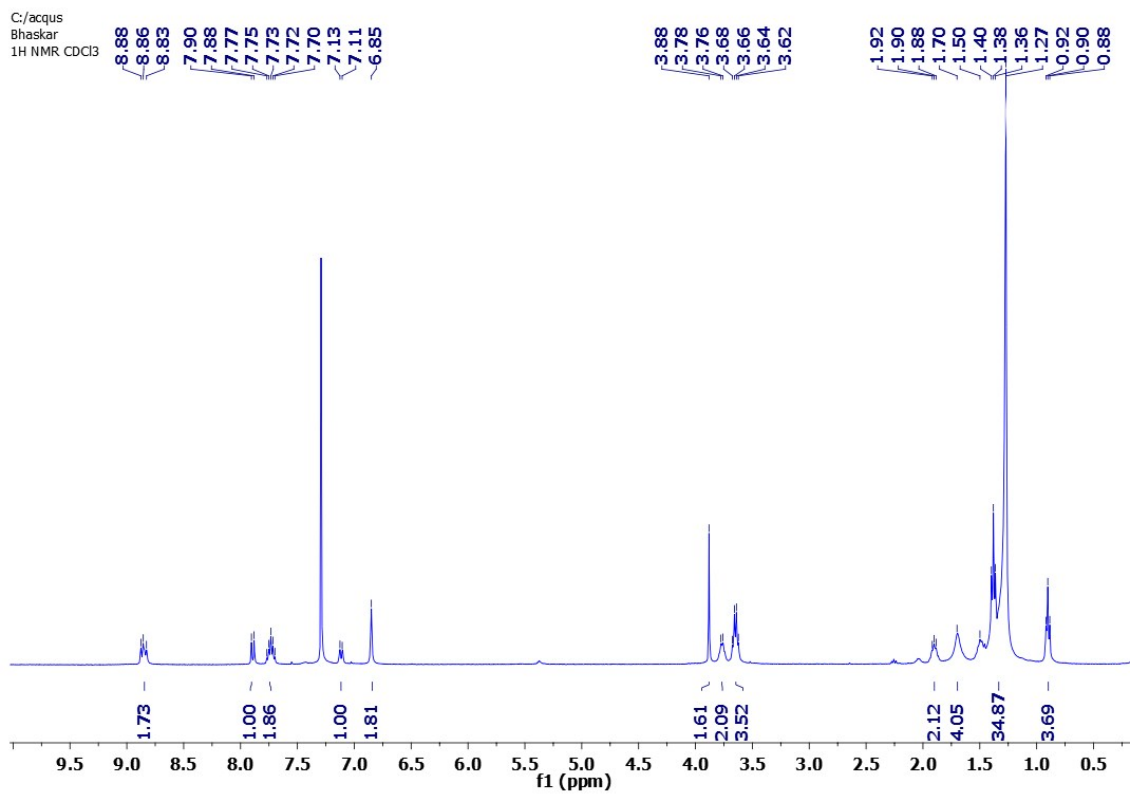

Figure S28.  $^1\text{H}$ -NMR of compound 5- $\text{R}_1$ (Et-NB-C18)

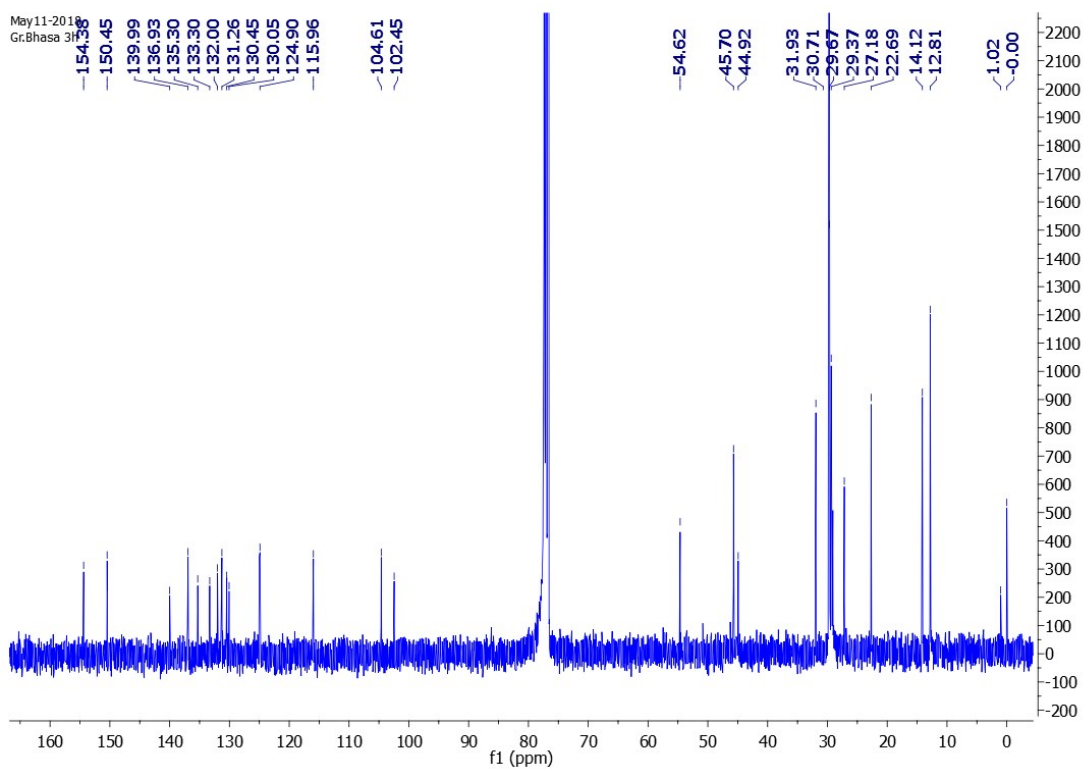

Figure S29.  $^{13}\text{C}$ -NMR of compound 5- $\text{R}_1$ (Et-NB-C18)



BHASKAR-M460-01 #40-51 RT: 0.11-0.14 AV: 12 SB: 10 0.83-0.86 NL: 1.92E6  
T: ITMS + c.ESI Full ms [200.00-1000.00]

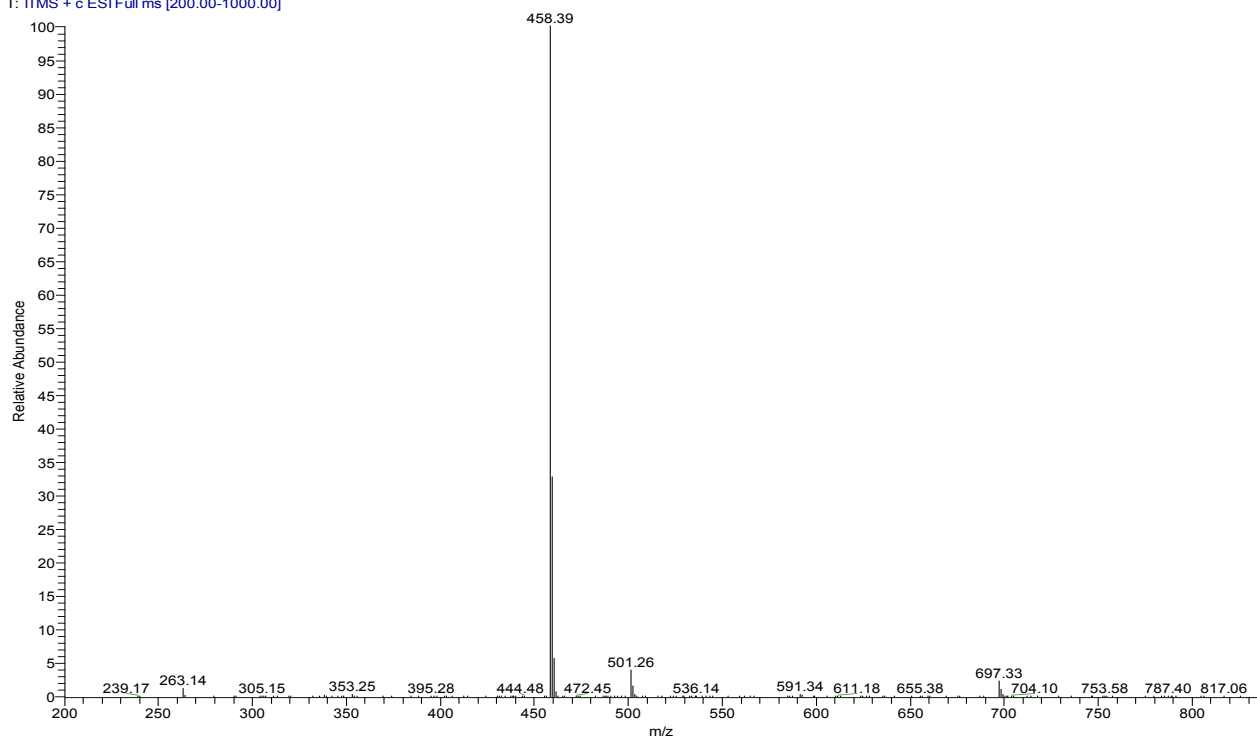

Figure S30. Mass of compound 6-R1(Mt-NB-O-C12)

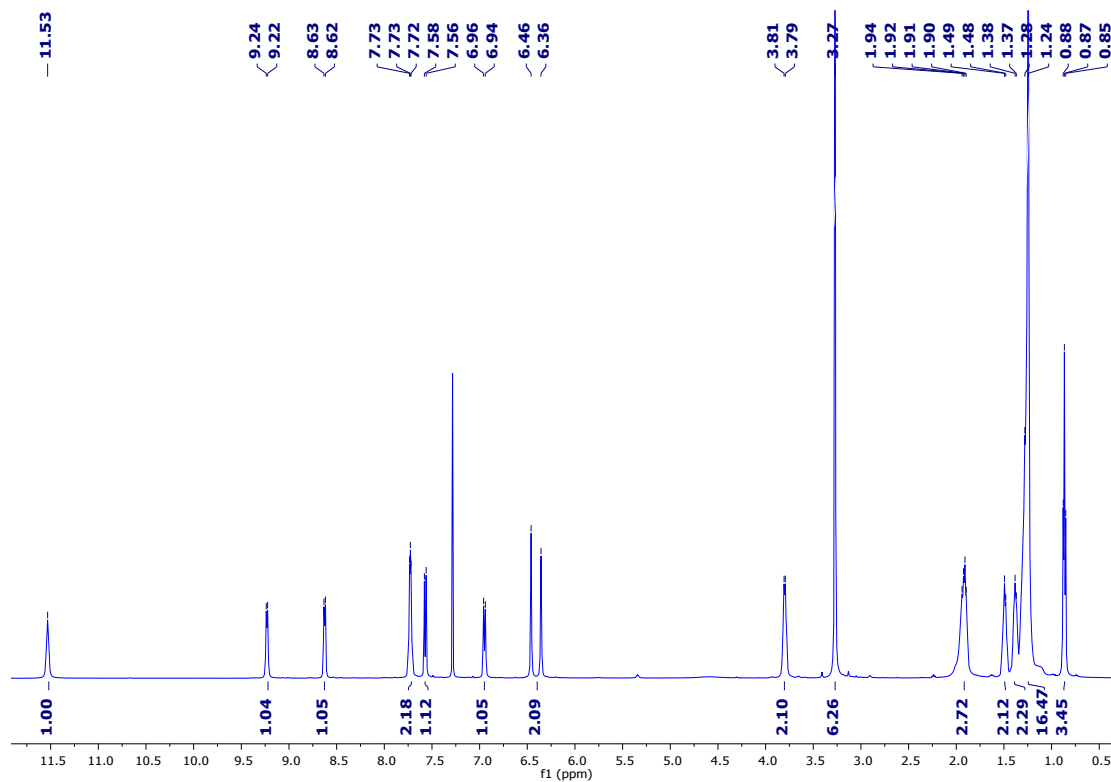

Figure S31. <sup>1</sup>H-NMR of compound 6-R1(Mt-NB-O-C12)

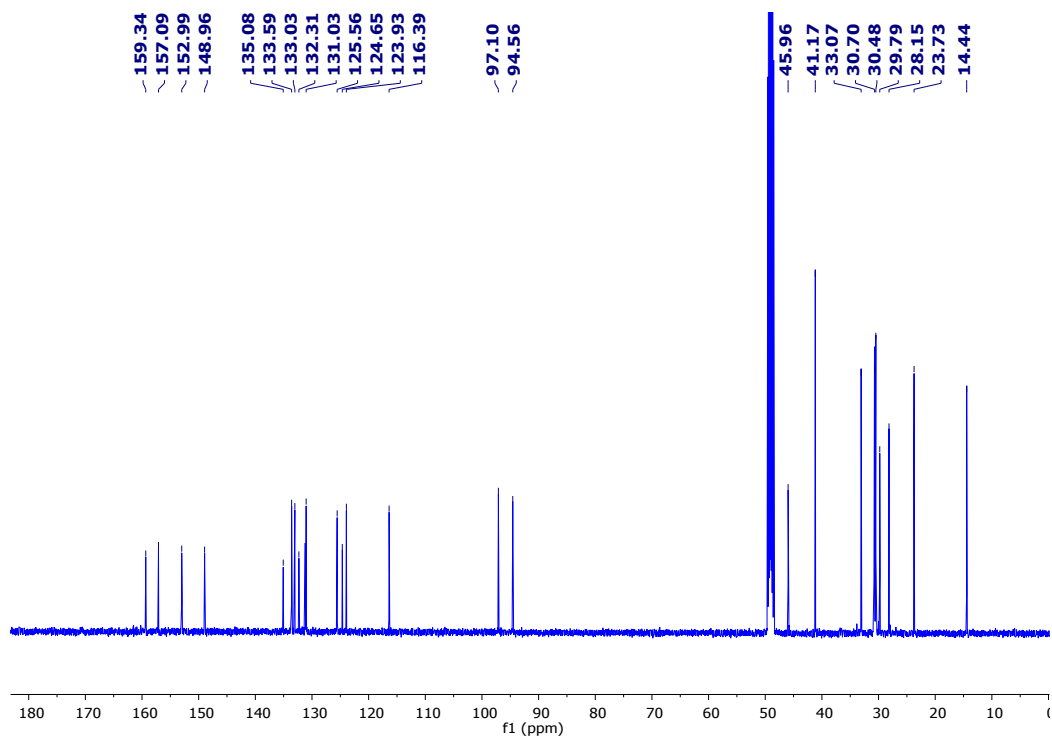

**Figure S32.**  $^{13}\text{C}$ -NMR of compound 6-R<sub>1</sub>(Mt-NB-O-C12)
